# Supplementary material for: The Impact of Age and Pathogens Type on the Gut Microbiota in Infants with Diarrhea in Dalian, China
Source: Hindawi journal article supplement (doi:10.1155/2020/8837156), 2020-11-30

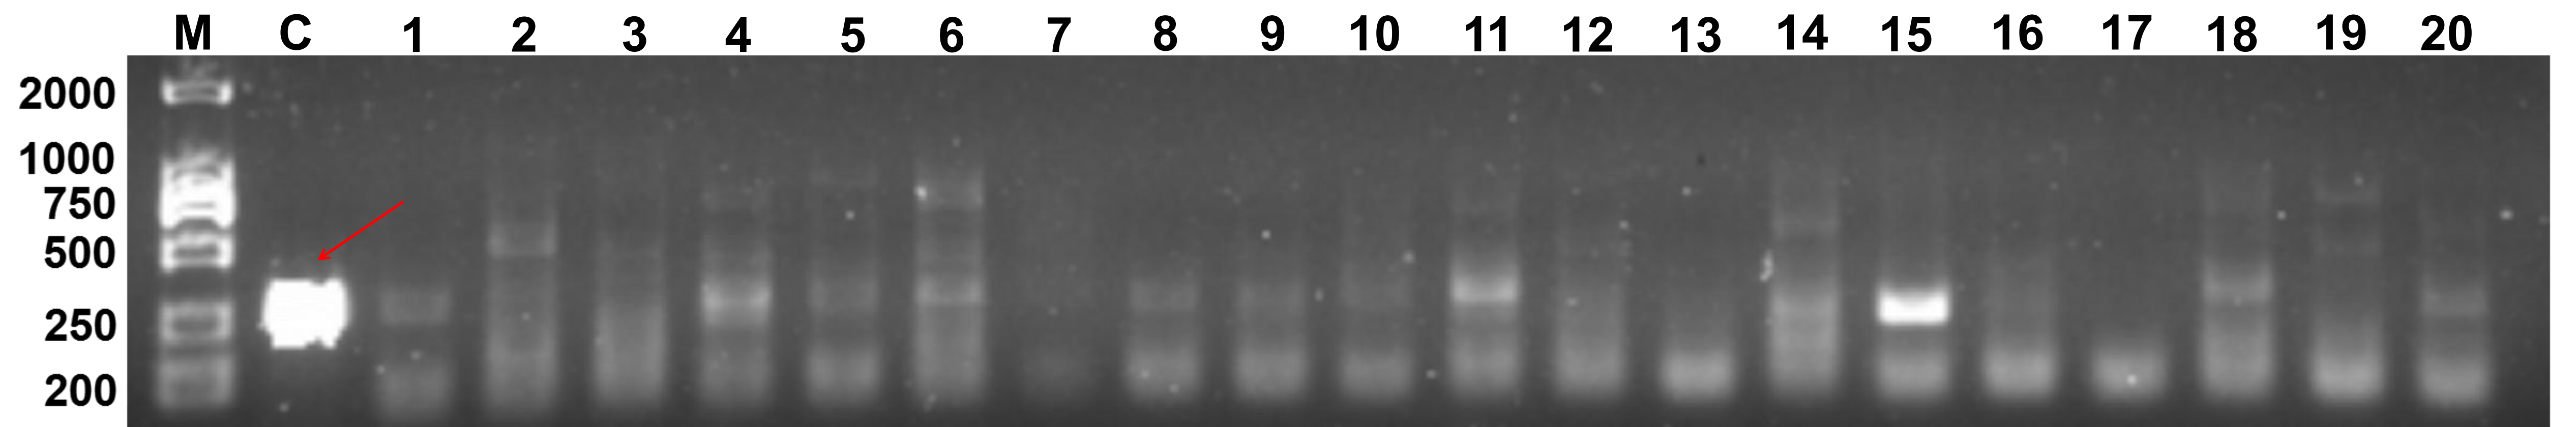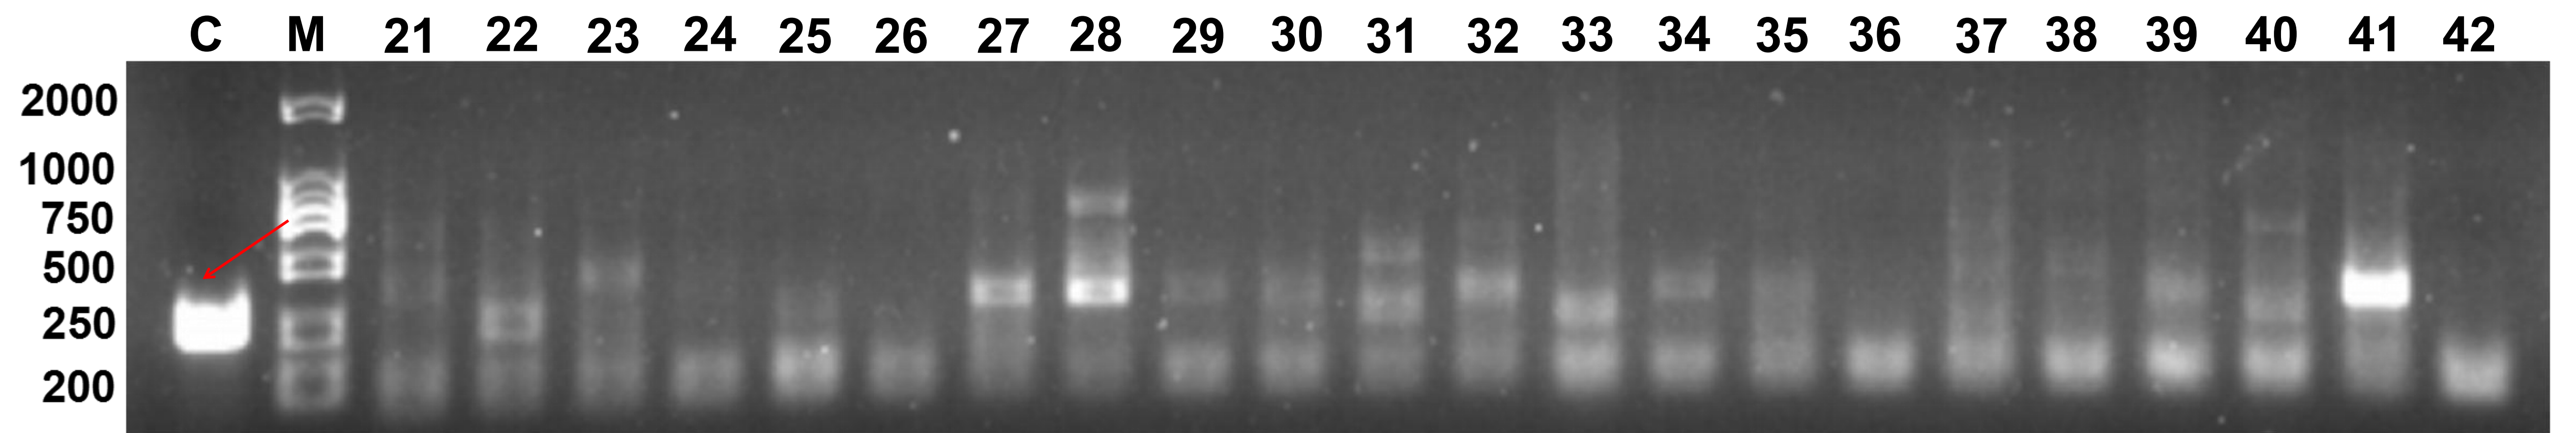

Supplement: f1 [file 8837156.f1.pdf]
